# Supplementary material for: Associations between physical activity, left atrial size and incident atrial fibrillation: the Tromsø Study 1994–2016
Source: HighWire-hosted journal article supplement (doi:10.1136/openhrt-2021-001823), 2022-01-01
Supplement: openhrt-2021-001823supp001_data_supplement.pdf [file openhrt-2021-001823supp001_data_supplement.pdf]

## SUPPLEMENTARY MATERIAL

### Associations between physical activity, left atrial size, and incident atrial fibrillation: The Tromsø Study 1994-2016

**Table S1.** Joint associations of PA and LA size with AF (HR  $\pm$ 95% CI). The Tromsø Study 1994-95.

|                               | N<br>(n=2479) | AF events,<br>% (n) | Person-years<br>(mean $\pm$ SD) | Model 1,<br>HR (95% CI) | Model 1,<br>p-value | Model 2,<br>HR (95% CI) | Model 2,<br>p-value |
|-------------------------------|---------------|---------------------|---------------------------------|-------------------------|---------------------|-------------------------|---------------------|
| LA enlarged,<br>active (ref.) | 282           | 15.2 (43)           | 17.1 (6.2)                      | 1.00 (ref.)             |                     | 1.00 (ref.)             |                     |
| LA enlarged,<br>inactive      | 483           | 25.5 (123)          | 14.9 (6.7)                      | 2.03 (1.43-2.87)        | <0.001              | 1.82 (1.28-2.59)        | 0.001               |
| LA normal,<br>inactive        | 1019          | 14.3 (146)          | 16.4 (6.7)                      | 0.99 (0.70-1.39)        | 0.948               | 1.11 (0.79-1.56)        | 0.555               |
| LA normal,<br>active          | 695           | 12.5 (87)           | 17.9 (6.3)                      | 0.76 (0.53-1.10)        | 0.148               | 1.02 (0.70-1.47)        | 0.938               |

PA: physical activity, LA: Left atrial, AF: atrial fibrillation, HR: Hazard ratio, CI: confidence interval, ref: reference, SD: standard deviation. Model 1 was unadjusted. Model 2 was adjusted for age, sex, body mass index, and systolic blood pressure.

**Table S2.** Joint associations of PA and LA size with AF, stratified on sex (HR  $\pm$ 95% CI). The Tromsø Study 1994-95.

|                               | N<br>(n=2479) | AF events,<br>% (n) | Person-years<br>(mean $\pm$ SD) | Model 1,<br>HR (95% CI)       | Model 1,<br>p-value | Model 2,<br>HR (95% CI)       | Model 2,<br>p-value |
|-------------------------------|---------------|---------------------|---------------------------------|-------------------------------|---------------------|-------------------------------|---------------------|
| <b>Female</b>                 | 1298          | 14.3 (185)          | 17.2 (6.4)                      |                               |                     |                               |                     |
| LA enlarged,<br>active (ref.) | 122           | 14.8 (18)           | 18.2 (5.6)                      | 1.00 (ref.)                   |                     | 1.00 (ref.)                   |                     |
| LA enlarged,<br>inactive      | 341           | 22.6 (77)           | 15.6 (6.7)                      | 1.92 (1.15-3.20)              | 0.013               | 1.36 (0.81-2.27)              | 0.244               |
| LA normal,<br>inactive        | 584           | 12.3 (72)           | 17.1 (6.4)                      | 0.91 (0.54-1.52)              | 0.714               | 0.86 (0.52-1.45)              | 0.581               |
| LA normal,<br>active          | 251           | 7.2 (18)            | 19.0 (5.7)                      | 0.45 (0.24-0.87)              | 0.018               | 0.62 (0.32-1.21)              | 0.161               |
| <b>Male</b>                   | 1181          | 18.1(214)           | 15.9 (6.8)                      | 1.41 (1.16-1.72) <sup>a</sup> | 0.001 <sup>a</sup>  | 1.79 (1.47-2.19) <sup>a</sup> | <0.001 <sup>a</sup> |
| LA enlarged,<br>active (ref.) | 160           | 15.6 (25)           | 16.2 (6.4)                      | 1.00 (ref.)                   |                     | 1.00 (ref.)                   |                     |
| LA enlarged,<br>inactive      | 142           | 32.4 (46)           | 13.3 (6.5)                      | 2.81 (1.72-4.57)              | <0.001              | 2.12 (1.30-3.47)              | 0.003               |
| LA normal,<br>inactive        | 435           | 17.0 (74)           | 15.4 (6.9)                      | 1.16 (0.74-1.83)              | 0.519               | 1.24 (0.78-1.95)              | 0.362               |
| LA normal,<br>active          | 444           | 15.5 (69)           | 17.2 (6.5)                      | 0.91 (0.58-1.44)              | 0.682               | 1.24 (0.78-1.98)              | 0.354               |

PA: physical activity, LA: Left atrial, AF: atrial fibrillation, HR: Hazard ratio, CI: confidence interval, ref.: reference, SD: standard deviation. Model 1 was unadjusted. Model 2 was adjusted for age, body mass index, and systolic blood pressure. <sup>a</sup> = Overall difference from female group

**Table S3.** Joint associations of PA and LA size with AF, stratified on age (HR  $\pm$ 95% CI). The Tromsø Study 1994-95.

|                                  | N<br>(n=2479) | AF events,<br>% (n) | Person-years<br>(mean $\pm$ SD) | Model 1,<br>HR (95% CI)       | Model 1,<br>p-value | Model 2,<br>HR (95% CI)       | Model 2,<br>p-value |
|----------------------------------|---------------|---------------------|---------------------------------|-------------------------------|---------------------|-------------------------------|---------------------|
| <b>&lt;65 years</b>              | 1697          | 12.7 (215)          | 17.9 (6.3)                      |                               |                     |                               |                     |
| LA enlarged,<br>active (ref.)    | 240           | 21.7 (52)           | 16.6 (6.6)                      | 1.00 (ref.)                   |                     | 1.00 (ref.)                   |                     |
| LA enlarged,<br>inactive         | 184           | 12.0 (22)           | 18.5 (5.8)                      | 2.11 (1.28-3.48)              | 0.003               | 2.28 (1.37-3.80)              | 0.001               |
| LA normal,<br>inactive           | 690           | 11.7 (81)           | 17.6 (6.5)                      | 1.04 (0.65-1.67)              | 0.858               | 1.12 (0.69-1.81)              | 0.642               |
| LA normal,<br>active             | 583           | 10.3 (60)           | 18.4 (6.1)                      | 0.86 (0.53-1.40)              | 0.545               | 0.87 (0.53-1.42)              | 0.578               |
| <b><math>\geq</math>65 years</b> | 782           | 23.5 (184)          | 13.9 (6.4)                      | 2.78 (2.28-3.40) <sup>a</sup> | <0.001 <sup>a</sup> | 2.59 (2.09-3.20) <sup>a</sup> | <0.001 <sup>a</sup> |
| LA enlarged,<br>active (ref.)    | 98            | 21.4 (21)           | 14.4 (6.0)                      | 1.00 (ref.)                   |                     | 1.00 (ref.)                   |                     |
| LA enlarged,<br>inactive         | 243           | 29.2 (71)           | 13.2 (6.4)                      | 1.55 (0.95-2.51)              | 0.080               | 1.76 (1.07-2.90)              | 0.025               |
| LA normal,<br>inactive           | 329           | 19.8 (65)           | 13.8 (6.3)                      | 0.98 (0.60-1.61)              | 0.946               | 1.07 (0.65-1.75)              | 0.802               |
| LA normal,<br>active             | 112           | 24.1 (27)           | 15.0 (6.5)                      | 1.05 (0.59-1.86)              | 0.868               | 1.01 (0.57-1.79)              | 0.968               |

PA: physical activity, LA: Left atrial, AF: atrial fibrillation, HR: Hazard ratio, CI: confidence interval, SD: standard deviation, ref.: reference. Model 1 was unadjusted. Model 2 was adjusted for sex, body mass index, and systolic blood pressure. <sup>a</sup> = Overall difference from age group <65 years

**Table S4.** Joint associations of PA, LA size and age with AF, stratified on sex. LA enlarged, inactive  $\geq 65$  years as reference. (HR  $\pm 95\%$  CI). The Tromsø Study 1994-95

|                                                    | N<br>(n=2479) | AF events,<br>% (n) | Person-years<br>(mean $\pm$ SD) | Model 1,<br>HR (95% CI) | Model 1,<br>p-value | Model 2,<br>HR (95% CI) | Model 2,<br>p-value |
|----------------------------------------------------|---------------|---------------------|---------------------------------|-------------------------|---------------------|-------------------------|---------------------|
| <b>Female</b>                                      | 1298          |                     |                                 |                         |                     |                         |                     |
| LA enlarged,<br>inactive $\geq 65$<br>years (ref.) | 178           | 29.2 (52)           | 13.9 (6.6)                      | 1.00 (ref.)             |                     | 1.00 (ref.)             |                     |
| LA enlarged,<br>active $\geq 65$<br>years          | 44            | 22.7 (10)           | 15.8 (6.0)                      | 0.64 (0.33-1.27)        | 0.201               | 0.68 (0.34-1.33)        | 0.258               |
| LA normal,<br>active $\geq 65$<br>years            | 40            | 17.5 (7)            | 17.2 (6.1)                      | 0.42 (0.19-0.93)        | 0.033               | 0.53 (0.24-1.19)        | 0.123               |
| LA normal,<br>inactive $\geq 65$<br>years          | 196           | 15.8 (31)           | 15.0 (6.1)                      | 0.49 (0.31-0.76)        | 0.002               | 0.52 (0.33-0.80)        | 0.003               |
| LA enlarged,<br>inactive $< 65$<br>years           | 163           | 15.3 (25)           | 17.5 (6.4)                      | 0.36 (0.22-0.58)        | $< 0.001$           | 0.42 (0.26-0.67)        | $< 0.001$           |
| LA normal,<br>inactive $< 65$<br>years             | 388           | 10.6 (41)           | 18.2 (6.3)                      | 0.23 (0.15-0.35)        | $< 0.001$           | 0.31 (0.20-0.47)        | $< 0.001$           |
| LA enlarged,<br>active $< 65$<br>years             | 78            | 10.3 (8)            | 19.6 (4.9)                      | 0.20 (0.10-0.43)        | $< 0.001$           | 0.30 (0.14-0.63)        | 0.002               |
| LA normal,<br>active $< 65$<br>years               | 211           | 5.2 (11)            | 19.3 (5.6)                      | 0.11 (0.06-0.20)        | $< 0.001$           | 0.15 (0.08-0.29)        | $< 0.001$           |
| <b>Male</b>                                        | 1181          |                     |                                 |                         |                     |                         |                     |
| LA enlarged,<br>inactive $\geq 65$<br>years (ref.) | 65            | 29.2 (19)           | 11.3 (5.7)                      | 1.00 (ref.)             |                     | 1.00 (ref.)             |                     |
| LA normal,<br>inactive $\geq 65$<br>years          | 133           | 25.6 (34)           | 11.9 (6.2)                      | 0.78 (0.45-1.37)        | 0.391               | 0.80 (0.46-1.40)        | 0.434               |
| LA enlarged,<br>inactive $< 65$<br>years           | 77            | 35.1 (27)           | 14.9 (6.7)                      | 0.75 (0.42-1.35)        | 0.335               | 0.73 (0.41-1.33)        | 0.306               |

|                                     |     |           |            |                  |        |                  |        |
|-------------------------------------|-----|-----------|------------|------------------|--------|------------------|--------|
| LA normal,<br>active ≥65<br>years   | 72  | 27.8 (20) | 13.7 (6.4) | 0.68 (0.36-1.28) | 0.235  | 0.70 (0.37-1.31) | 0.263  |
| LA enlarged,<br>active ≥65<br>years | 54  | 20.4 (11) | 13.3 (5.7) | 0.54 (0.26-1.13) | 0.103  | 0.57 (0.27-1.20) | 0.140  |
| LA normal,<br>inactive <65<br>years | 302 | 13.2 (40) | 17.0 (6.6) | 0.23 (0.13-0.40) | <0.001 | 0.23 (0.13-0.41) | <0.001 |
| LA normal,<br>active <65<br>years   | 372 | 13.2 (49) | 17.9 (6.3) | 0.21 (0.12-0.36) | <0.001 | 0.23 (0.13-0.40) | <0.001 |
| LA enlarged,<br>active <65<br>years | 106 | 13.2 (14) | 17.7 (6.3) | 0.22 (0.11-0.43) | <0.001 | 0.22 (0.11-0.45) | <0.001 |

---

PA: physical activity, LA: Left atrial, AF: atrial fibrillation, HR: Hazard ratio, CI: confidence interval, SD: standard deviation, ref.: reference. Model 1 was unadjusted. Model 2 was adjusted for body mass index and systolic blood pressure

**Table S5.** Joint associations of PA, LA size and age with AF, stratified on sex. LA enlarged, active <65 years as reference. (HR  $\pm$ 95% CI). The Tromsø Study 1994-95.

|                                              | N= (2479) | AF events,<br>% (n) | Person-years<br>(mean $\pm$ SD) | Model 2,<br>HR (95% CI) | Model 2,<br>p-value |
|----------------------------------------------|-----------|---------------------|---------------------------------|-------------------------|---------------------|
| <b>Female</b>                                | 1298      |                     |                                 |                         |                     |
| LA enlarged, active<br><65 years (ref.)      | 78        | 10.3 (8)            | 19.6 (4.9)                      | 1.00 (ref.)             |                     |
| LA enlarged, inactive<br>$\geq$ 65 years (1) | 178       | 29.2 (52)           | 13.9 (6.6)                      | 3.39 (1.59-7.25)        | 0.002               |
| LA enlarged, inactive<br><65 years (2)       | 163       | 15.3 (25)           | 17.5 (6.4)                      | 1.41 (0.63-3.14)        | 0.402               |
| LA enlarged, active<br>$\geq$ 65 years (3)   | 44        | 22.7 (10)           | 15.8 (6.0)                      | 2.29 (0.90-5.86)        | 0.083               |
| LA normal, inactive<br>$\geq$ 65 years (4)   | 196       | 15.8 (31)           | 15.0 (6.1)                      | 1.74 (0.79-3.83)        | 0.166               |
| LA normal, inactive<br><65 years (5)         | 388       | 10.6 (41)           | 18.2 (6.3)                      | 1.04 (0.49-2.22)        | 0.919               |
| LA normal, active $\geq$ 65<br>years (6)     | 40        | 17.5 (7)            | 17.2 (6.1)                      | 1.80 (0.65-4.98)        | 0.255               |
| LA normal, active <65<br>years (7)           | 211       | 5.2 (11)            | 19.3 (5.6)                      | 0.50 (0.20-1.25)        | 0.137               |
| <b>Male</b>                                  | 1181      |                     |                                 |                         |                     |
| LA enlarged, active<br><65 years (ref.)      | 106       | 13.2 (14)           | 17.7 (6.3)                      | 1.00 (ref.)             |                     |
| LA enlarged, inactive<br>$\geq$ 65 years (1) | 65        | 29.2 (19)           | 11.3 (5.7)                      | 4.46 (2.23-8.94)        | <0.001              |
| LA enlarged, inactive<br><65 years (2)       | 77        | 35.1 (27)           | 14.9 (6.7)                      | 3.27 (1.71-6.26)        | <0.001              |
| LA enlarged, active<br>$\geq$ 65 years (3)   | 54        | 20.4 (11)           | 13.3 (5.7)                      | 2.55 (1.16-5.63)        | 0.021               |
| LA normal, inactive<br>$\geq$ 65 years (4)   | 133       | 25.6 (34)           | 11.9 (6.2)                      | 3.56 (1.91-6.66)        | <0.001              |
| LA normal, inactive<br><65 years (5)         | 302       | 13.2 (40)           | 17.0 (6.6)                      | 1.04 (0.56-1.93)        | 0.900               |
| LA normal, active $\geq$ 65<br>years (6)     | 72        | 27.8 (20)           | 13.7 (6.4)                      | 3.11 (1.57-6.18)        | 0.001               |
| LA normal, active <65<br>years (7)           | 372       | 13.2 (49)           | 17.9 (6.3)                      | 1.02 (0.56-1.86)        | 0.943               |

PA: physical activity, LA: Left atrial, AF: atrial fibrillation, HR: Hazard ratio, CI: confidence interval, SD: standard deviation, ref.: reference. Model 1 was unadjusted. Model 2 was adjusted for body mass index and systolic blood pressure

**Table S6.** Association between PA with five categories and AF (HR  $\pm$ 95% CI). The Tromsø Study 1994-95.

|                        | N<br>(n=2472) | AF events,<br>% (n) | Person-years<br>(mean $\pm$ SD) | Model 1,<br>HR (95% CI) | Model 1,<br>p-value | Model 2,<br>HR (95% CI) | Model 2,<br>p-value |
|------------------------|---------------|---------------------|---------------------------------|-------------------------|---------------------|-------------------------|---------------------|
| Sedentary <sup>a</sup> | 265           | 17.7 (47)           | 15.2 (6.8)                      | 1.00 (ref.)             |                     | 1.00 (ref.)             |                     |
| Inactive <sup>b</sup>  | 1236          | 18.0 (222)          | 16.1 (6.7)                      | 0.94 (0.68-1.28)        | 0.682               | 1.00 (0.73-1.38)        | 0.987               |
| Low <sup>c</sup>       | 381           | 13.1 (50)           | 17.4 (6.5)                      | 0.61 (0.41-0.91)        | 0.014               | 0.80 (0.54-1.21)        | 0.290               |
| Moderate <sup>d</sup>  | 390           | 12.3 (48)           | 17.8 (6.0)                      | 0.56 (0.37-0.83)        | 0.004               | 0.68 (0.45-1.03)        | 0.068               |
| Vigorous <sup>e</sup>  | 200           | 15.5 (31)           | 17.7 (6.1)                      | 0.71 (0.45-1.11)        | 0.131               | 0.85 (0.54-1.36)        | 0.500               |

PA: physical activity, AF: atrial fibrillation, HR: Hazard ratio, CI: confidence interval, SD: standard deviation, ref.: reference. Model 1 was unadjusted. Model 2 was adjusted for sex, body mass index, and systolic blood pressure.

<sup>a</sup> = light and hard PA 0 hours/week

<sup>b</sup> = light PA >0 hours/week and hard PA 0 hours/week

<sup>c</sup> = hard PA 0-1 hour/week

<sup>d</sup> = hard PA 1-2 hours/week

<sup>e</sup> = hard PA  $\geq$ 3 hours/week

**Table S7.** Sensitivity analysis: Association between PA and AF adjusted for hypertension groups (HR  $\pm$ 95% CI). The Tromsø Study 1994-95.

|          | N<br>(n=2468) | AF events,<br>% (n) | Model 1,<br>HR (95% CI) | Model 2,<br>HR (95% CI) | Model 3,<br>HR (95% CI) |
|----------|---------------|---------------------|-------------------------|-------------------------|-------------------------|
| Inactive | 1497          | 18.0 (269)          | 1.00 (ref.)             | 1.00 (ref.)             | 1.00 (ref.)             |
| Low      | 382           | 13.1 (50)           | 0.64 (0.47-0.87)        | 0.80 (0.59-1.09)        | 0.79 (0.58-1.08)        |
| Moderate | 388           | 12.1 (47)           | 0.58 (0.42-0.79)        | 0.67 (0.49-0.92)        | 0.68 (0.50-0.93)        |
| Vigorous | 201           | 15.9 (32)           | 0.76 (0.53-1.10)        | 0.89 (0.61-1.29)        | 0.88 (0.61-1.28)        |

PA: physical activity, AF: atrial fibrillation, HR: Hazard ratio, CI: confidence interval, ref.: reference.

Model 1 was unadjusted. Model 2 was adjusted for age, sex, body mass index, and systolic blood pressure.

Model 3 was adjusted for age, sex, body mass index, and hypertension groups.



**Table S8.** Sensitivity analysis: Association between PA and AF with covariates in Model 3 (HR  $\pm$ 95% CI). The Tromsø Study 1994-95.

|          | N<br>(n=1614) | AF events,<br>% (n) | Model 1,<br>HR (95% CI) | Model 2,<br>HR (95% CI) | Model 3,<br>HR (95% CI) |
|----------|---------------|---------------------|-------------------------|-------------------------|-------------------------|
| Inactive | 872           | 16.1 (140)          | 1.00 (ref.)             | 1.00 (ref.)             | 1.00 (ref.)             |
| Low      | 293           | 14.0 (41)           | 0.80 (0.56-1.13)        | 0.95 (0.66-1.35)        | 0.95 (0.66-1.37)        |
| Moderate | 298           | 10.7 (32)           | 0.60 (0.41-0.88)        | 0.65 (0.44-0.97)        | 0.66 (0.45-0.98)        |
| Vigorous | 151           | 16.6 (25)           | 0.95 (0.62-1.45)        | 1.01 (0.65-1.56)        | 0.95 (0.61-1.47)        |

PA: physical activity, AF: atrial fibrillation, HR: Hazard ratio, CI: confidence interval, ref.: reference, LDL: low-density lipoprotein, LV: left ventricular.

Model 1 was unadjusted. Model 2 was adjusted for age, sex, body mass index, systolic blood pressure. Model 3 was adjusted for Model 2 in addition to smoke, coffee, diabetes, LDL cholesterol, palpitations, LV myocardial mass index, thyroid disease, C-reactive protein, alcohol, resting heart rate.

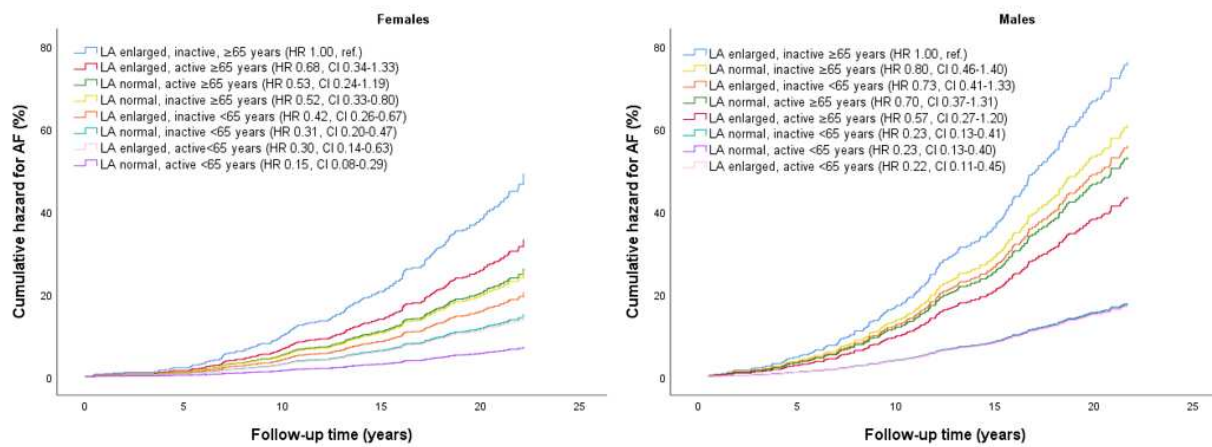

**Figure S1.** Adjusted cumulative hazard for AF by joint associations of PA, LA size, and age with AF risk, stratified by sex. Differences between groups are indicated with HR and 95% CI. The model is adjusted for body mass index and systolic blood pressure. AF: atrial fibrillation, LA: left atrial/left atrium, HR: hazard ratio, CI: confidence interval. The Tromsø Study 1994-95.
